# Supplementary material
Source: publisher site journal article supplement (https://www.degruyterbrill.com/publication/isbn/9783110312973/downloadAsset/9783110312973_Inhaltsverzeichnis.pdf)
Supplement: Supplementary file 1 [file 9783110312973_Inhaltsverzeichnis.pdf]

# Inhaltsverzeichnis

## Vorwort zur 4. Auflage — V

### 1 Einleitung — 1

- 1.1 Was ist Grammatik? — 1
- 1.2 Zeichen, Wörter, Wortarten — 10

### 2 Wortbildung — 20

### 3 Verbtypen — 31

- 3.1 Semantische Klassifikation — 31
  - 3.1.1 Handlung – Vorgang – Zustand — 31
  - 3.1.2 Aspekte und Aktionsarten — 33
- 3.2 Morphologische Klassifikation — 40
  - 3.2.1 Synthetische Tempusbildung — 41
  - 3.2.2 Analytische Tempusbildung — 47
- 3.3 Syntaktische Klassifikation — 50
  - 3.3.1 Rektion und Valenz — 50
  - 3.3.2 Weitere Einteilungen nach syntaktischen Kriterien — 55
- 3.4 Funktionsklassen — 61
  - 3.4.1 Voll-, Hilfs- und Kopulaverben — 61
  - 3.4.2 Modalverben — 64
  - 3.4.3 Modifizierende Verben — 72
  - 3.4.4 Funktionsverben — 74
  - 3.4.5 Andere Funktionsklassen-Einteilungen — 77
- 3.5 Wortbildung des Verbs — 77

### 4 Formen des Verbs — 81

- 4.1 Person — 81
- 4.2 Numerus — 81
- 4.3 Tempus — 82
- 4.4 Modus — 101
- 4.5 Genus Verbi — 113
- 4.6 Progressiv und Absentiv — 123

### 5 Das Substantiv — 134

- 5.1 Klassifikation der Substantive — 135
- 5.2 Formenbestand des Substantivs — 137

|          |                                                    |            |
|----------|----------------------------------------------------|------------|
| 5.3      | Numerus und Genus —                                | 145        |
| 5.4      | Kasus —                                            | 154        |
| 5.4.1    | Nominativ —                                        | 156        |
| 5.4.2    | Genitiv —                                          | 158        |
| 5.4.3    | Dativ —                                            | 163        |
| 5.4.4    | Akkusativ —                                        | 172        |
| 5.5      | Wortbildung des Substantivs —                      | 175        |
| <b>6</b> | <b>Das Adjektiv —</b>                              | <b>186</b> |
| 6.1      | Semantische Klassifikationen —                     | 186        |
| 6.2      | Syntaktische Funktionen —                          | 188        |
| 6.3      | Formenbestand des Adjektivs —                      | 194        |
| 6.4      | Rektion —                                          | 200        |
| 6.5      | Wortbildung des Adjektivs —                        | 203        |
| <b>7</b> | <b>Artikel, Pronomina, Numeralia —</b>             | <b>208</b> |
| 7.1      | Artikel —                                          | 208        |
| 7.2      | Pronomina —                                        | 218        |
| 7.2.1    | Personalpronomina —                                | 219        |
| 7.2.2    | Possessiva —                                       | 223        |
| 7.2.3    | Reflexiva —                                        | 224        |
| 7.2.4    | Demonstrativa —                                    | 225        |
| 7.2.5    | Relativa —                                         | 227        |
| 7.2.6    | Interrogativa —                                    | 229        |
| 7.2.7    | Indefinitpronomina und -adverbien —                | 230        |
| 7.3      | Numeralia —                                        | 234        |
| <b>8</b> | <b>Adverbien —</b>                                 | <b>238</b> |
| <b>9</b> | <b>Partikeln im weiteren Sinne —</b>               | <b>248</b> |
| 9.1      | Präpositionen —                                    | 251        |
| 9.2      | Konjunktionen —                                    | 261        |
| 9.2.1    | Koordinierende und subordinierende Konjunktionen — | 262        |
| 9.2.2    | Mehrteilige Konjunktionen —                        | 266        |
| 9.2.3    | Semantische Klassifikation —                       | 268        |
| 9.3      | Konjunkionaladverbien —                            | 278        |
| 9.4      | Modalwörter —                                      | 281        |
| 9.5      | Abtönungspartikeln —                               | 283        |
| 9.6      | Intensivpartikeln —                                | 291        |

|           |                                                                   |            |
|-----------|-------------------------------------------------------------------|------------|
| 9.7       | Fokuspartikeln —                                                  | 293        |
| 9.8       | Antwortpartikeln —                                                | 294        |
| 9.9       | Die Negationspartikel <i>nicht</i> —                              | 296        |
| 9.10      | Interjektionen —                                                  | 297        |
| <b>10</b> | <b>Die Struktur des Satzes —</b>                                  | <b>302</b> |
| 10.1      | Satz und Text —                                                   | 302        |
| 10.2      | Prädikat —                                                        | 306        |
| 10.3      | Subjekt —                                                         | 314        |
| 10.4      | Objekte —                                                         | 329        |
| 10.4.1    | Akkusativobjekt —                                                 | 332        |
| 10.4.2    | Dativobjekt —                                                     | 336        |
| 10.4.3    | Genitivobjekt —                                                   | 337        |
| 10.4.4    | Präpositionalobjekt —                                             | 339        |
| 10.4.5    | Objekte zweiten Grades<br>(Objekte bei prädikativen Adjektiven) — | 341        |
| 10.5      | Adverbialbestimmungen (Adverbiale) —                              | 344        |
| 10.6      | Komplemente und Supplemente,<br>Ergänzungen und Angaben —         | 351        |
| 10.7      | Attribute —                                                       | 356        |
| 10.7.1    | Kongruierende Attribute —                                         | 358        |
| 10.7.2    | Nicht-kongruierende Attribute —                                   | 360        |
| 10.7.3    | Appositionen —                                                    | 365        |
| 10.7.4    | Attribute in verschiedenen Grammatikmodellen —                    | 370        |
| <b>11</b> | <b>Satzarten und Wortstellung —</b>                               | <b>373</b> |
| 11.1      | Satztypen —                                                       | 373        |
| 11.2      | Nebensätze —                                                      | 380        |
| 11.3      | Wortstellung im Hauptsatz —                                       | 389        |
| 11.4      | Wortstellung im Nebensatz —                                       | 395        |
| 11.5      | Stellung von Attributen —                                         | 397        |
| <b>12</b> | <b>Syntaxmodelle —</b>                                            | <b>402</b> |
| 12.1      | Die inhaltsbezogene Grammatik —                                   | 403        |
| 12.2      | Die Abhängigkeitsgrammatik —                                      | 406        |
| 12.3      | IC-Analyse und Phrasenstrukturgrammatik —                         | 414        |
| 12.4      | Die Generative Grammatik —                                        | 418        |
| 12.5      | Die Optimalitätstheorie —                                         | 426        |
| 12.6      | Kognitive Grammatik —                                             | 428        |

**13      Schrift und Rechtschreibung — 433**

13.1      Schriftsysteme — 433

13.2      Alphabetschriften — 436

13.3      Getrennt- und Zusammenschreibung — 442

13.4      Groß- und Kleinschreibung — 444

**14      Literaturverzeichnis — 447**

**Index — 461**
